# Supplementary material for: Short-Term Effects of Air Pollution on Respiratory and Circulatory Morbidity in Colombia 2011–2014: A Multi-City, Time-Series Analysis
Source: Int J Environ Res Public Health. 2018 Jul 30;15(8):1610. doi: 10.3390/ijerph15081610 (PMC6121387; doi:10.3390/ijerph15081610)
Supplement: Supplementary file 1 [file ijerph-15-01610-s001.xlsx]

## Sheet: Bogota
	Table S1. Estimates of the effect on the general population in terms of respiratory, cardiovascular, and cerebrovascular diseases, by type of pollutant and age group, Bogota, 2011-2014
	BOGOTA
	Pollutant	Age group	Respiratory diseases				Cardiovascular diseses				Cerebrovascular diseases
			Changea	IC 95%		p	Changea	IC 95%		p	Changea	IC 95%		p	Obs
	NO2 (per increase in 6 μg/m3)	0 - 4 years	7.12	2.99	11.4	0.001									24778
		5 -9 years	2.06	-0.02	6.06	0.298
		10 - 14 years	-0.01	-0.04	3.4	0.799
		15-44 years	3.65	1.85	5.47	0	2.29	0.36	4.25	0.019	0.49	-0.02	2.62	0.644
		45 - 60 years	1.76	-0.01	4.15	0.141	2.18	-0.01	4.83	0.099	0.61	-0.03	3.32	0.654
		>60 years	1.74	-0.01	3.67	0.071	2.63	0.55	4.75	0.013	1.35	-0.01	3.37	0.184
	SO2 (per increase in 2 μg/m3)	0 - 4 years	-28.1	-30	-24.8	0									24778
		5 -9 years	7.44	3.73	11.28	0
		10 - 14 years	6.76	3.08	10.58	0
		15-44 years	4.1	2.45	5.77	0	2.88	1.12	4.67	0.001	2.34	0.42	4.29	0.016
		45 - 60 years	2.6	0.44	4.8	0.018	4.33	1.93	6.78	0	5.71	3.19	8.28	0
		>60 years	1.46	-0.01	3.22	0.096	5.21	3.28	7.18	0	4.52	2.66	6.41	0
	PM10 (per increase 10 μg/m3)	0 - 4 years	1.25	-0.02	0.44	0.431									24778
		5 -9 years	0.91	-0.03	4.05	0.563
		10 - 14 years	-0.01	-0.32	2.97	0.927
		15-44 years	2.22	0.82	3.64	0.002	2.75	1.22	4.31	0	3.85	2.14	5.59	0
		45 - 60 years	1.37	-0.01	3.26	0.148	1.72	-0.01	3.81	0.1	4.31	2.11	6.54	0
		>60 years	-0.01	-0.02	1.23	0.733	1.94	0.3	3.61	0.02	1.1	-0.01	2.71	0.174
	PM2.5 (per increase 5 μg/m3)	0 - 4 years	-1.14	-1.23	-0.09	0									23130
		5 -9 years	4.11	1.71	6.57	0.001
		10 - 14 years	1.97	-0.01	4.37	0.101
		15-44 years	1.16	0.08	2.25	0.034	1.61	0.43	2.8	0.007	0.93	-0.01	2.22	0.156
		45 - 60 years	0.78	-0.01	2.21	0.282	1.62	0.04	3.22	0.044	2.22	0.58	3.89	0.008
		>60 years	-0.01	-0.02	1.07	0.89	1.81	0.54	3.09	0.005	1.23	0.02	2.46	0.046
	CO max 8 hours (per increase in 0,4 mg/m3)	0 - 4 years	0.45	0.19	0.72	0.001									24778
		5 -9 years	0.13	-0.01	0.39	0.298
		10 - 14 years	-0.01	-0.01	0.22	0.799
		15-44 years	0.23	0.12	0.35	0	0.15	0.02	0.27	0.019	0.03	-0.01	0.17	0.644
		45 - 60 years	0.11	-0.01	0.27	0.141	0.14	-0.01	0.31	0.099	0.04	-0.01	0.21	0.654
		>60 years	0.11	-0.01	0.24	0.071	0.17	0.03	0.31	0.013	0.09	-0.001	0.22	0.184
	O3 max 8 hours (per increase in 10 μg/m3)	0 - 4 years	-11.1	-13.7	-0.07	0									24795
		5 -9 years	2.13	-0.02	5.7	0.228
		10 - 14 years	-0.02	-0.05	2.17	0.465
		15-44 years	-0.03	-0.05	-0.02	0.001	-0.01	-0.02	1.52	0.826	-0.01	-0.03	1.08	0.407
		45 - 60 years	-0.02	-0.04	0.58	0.157	0.59	-0.02	2.92	0.613	-0.02	-0.04	1.01	0.261
		>60 years	0.98	-0.01	2.72	0.258	0.96	-0.01	2.84	0.303	0.25	-0.02	2.03	0.78
	Change refers to the percentage of change in the rate of emergency department visits for the specific disease groups, adjusted for temperature, relative humidity, precipitation, and their interactions with pollutant concentrations. All pollutants were centered to the value that represented 20% of the global mean concentration in the time-series for the four cities. Positive, statistically signifi…

## Sheet: Medellin
	Table S2. Estimates of the effect on the general population in terms of respiratory, cardiovascular, and cerebrovascular diseases, by type of pollutant and age group, Medellin, 2011-2014
	MEDELLIN
	Pollutant	Age group	Respiratory diseases				Cardiovascular diseses				Cerebrovascular diseases
			Changea	IC 95%		p	Changea	IC 95%		p	Changea	IC 95%		p	Obs
	NO2 (per increase in 6 μg/m3)	0 - 4 years	-0.01	-0.06	3.95	0.703									11172
		5 -9 years	-0.01	-0.05	4.05	0.829
		10 - 14 years	-0.02	-0.06	3.33	0.603					No estimable
		15-44 years	-0.01	-0.03	1.89	0.841	0.6	-0.02	2.7	0.57
		45 - 60 years	-0.02	-0.04	1.57	0.399	2.23	-0.01	5.08	0.115
		>60 years	0.89	-0.02	3.18	0.433	5.65	3.35	8	0
	SO2 (per increase in 2 μg/m3)	0 - 4 years
		5 -9 years
		10 - 14 years
		15-44 years
		45 - 60 years
		>60 years
	PM10 (per increase 10 μg/m3)	0 - 4 years	-0.09	-12.51	-0.04	0									18483
		5 -9 years	2.29	-0.02	6.4	0.258
		10 - 14 years	0.67	-0.04	4.72	0.737
		15-44 years	0.35	-0.02	2.2	0.707	-0.02	-0.03	0.67	0.212	1.98	-0.01	4.7	0.143
		45 - 60 years	-0.03	-0.05	1.77	0.069	0.41	-0.03	2.94	0.743	-0.03	-0.06	-0.01	0.034
		>60 years	-0.02	-0.04	0.2	0.079	0.75	-0.02	2.77	0.455	3.6	1.58	5.65	0
	PM2.5 (per increase 5 μg/m3)	0 - 4 years	5.94	1.75	10.3	0.005									18654
		5 -9 years	0.31	-0.04	3.9	0.864
		10 - 14 years	-0.02	-0.05	2.46	0.544
		15-44 years	-0.01	-0.03	0.69	0.256	1.04	-0.01	2.74	0.219	-0.03	-0.05	0.1	0.061
		45 - 60 years	-0.02	-0.04	0.71	0.189	-0.01	-0.03	1.97	0.252	0.21	-0.03	2.68	0.861
		>60 years	-0.02	-0.04	0.45	0.144	-0.02	-0.03	0.73	0.252	-0.02	-0.03	0.48	0.154
	CO max 8 hours (per increase in 0,4 mg/m3)	0 - 4 years	-0.01	-0.01	0.25	0.703									11172
		5 -9 years	-0.01	-0.01	0.26	0.829
		10 - 14 years	-0.01	-0.01	0.22	0.603					No estimable
		15-44 years	-0.01	-0.01	0.12	0.841	0.04	-0.01	0.17	0.57
		45 - 60 years	-0.01	-0.01	0.1	0.399	0.14	-0.01	0.33	0.115
		>60 years	0.06	-0.01	0.21	0.433	0.36	0.22	0.51	0
	O3 max 8 hours (per increase in 10 μg/m3)	0 - 4 years	0.41	-0.05	5.94	0.882									8812
		5 -9 years	4.2	-0.02	9.95	0.132
		10 - 14 years	2.13	-0.04	7.77	0.441
		15-44 years	-0.02	-0.04	0.75	0.178	-0.01	-0.04	1.48	0.428	12.17	10.29	14.09	0
		45 - 60 years	-0.03	-0.07	0.24	0.07	0.07	0.04	3.47	0.963	5.84	4.69	7	0
		>60 years	-0.02	-0.05	1.05	0.241	-0.01	-0.04	2.02	0.635	9.52	8.91	10.13	0
	Change refers to the percentage of change in the rate of emergency department visits for the specific disease groups, adjusted for temperature, relative humidity, precipitation, and their interactions with pollutant concentrations. All pollutants were centered to the value that represented 20% of the global mean concentration in the time-series for the four cities. Positive, statistically signifi…

## Sheet: Cali
	Table S3. Estimates of the effect on the general population in terms of respiratory, cardiovascular, and cerebrovascular diseases, by type of pollutant and age group, Cali, 2011-2014
	CALI
	Pollutant	Age group	Respiratory diseases				Cardiovascular diseses				Cerebrovascular diseases
			Changea	IC 95%		p	Changea	IC 95%		p	Changea	IC 95%		p	Obs
	NO2 (per increase in 6 μg/m3)	0 - 4 years	-0.08	-18.2	4.19	0.195									6912
		5 -9 years	8.79	-0.04	22.79	0.172
		10 - 14 years	5.46	-0.07	19.07	0.39
		15-44 years	1.28	-0.05	7.01	0.649	12.49	6.36	18.98	0	-16.7	-24.6	-10.2	0
		45 - 60 years	-0.03	-0.09	4.65	0.455	9.41	1.37	18.08	0.021	14.09	4.41	24.67	0.004
		>60 years	-0.01	-0.07	5.78	0.915	9.81	3.41	16.59	0.002	8.39	1.94	15.26	0.01
	SO2 (per increase in 2 μg/m3)	0 - 4 years	-0.04	-0.04	-0.03	0									11969
		5 -9 years	1.27	0.07	1.84	0
		10 - 14 years	0.5	-0.01	1.06	0.082
		15-44 years	0.51	0.2	0.82	0.001	0.19	-0.01	0.44	0.132	-0.01	-0.02	-0.01	0.003
		45 - 60 years	0.51	0.14	0.89	0.007	0.59	0.25	0.92	0.001	0.62	0.26	0.99	0.001
		>60 years	0.83	0.51	1.16	0	0.67	0.4	0.93	0	0.59	0.33	0.85	0
	PM10 (per increase 10 μg/m3)	0 - 4 years	18.7	12.62	25.11	0									20235
		5 -9 years	-0.05	-0.09	-0.01	0.037
		10 - 14 years	-0.03	-0.07	2.43	0.33
		15-44 years	3.55	1.31	5.84	0.002	1.76	-0.01	4.02	0.119	0.83	-0.03	4.38	0.639
		45 - 60 years	-0.02	-0.05	1.29	0.273	-0.01	-0.04	2.03	0.534	5.48	1.99	9.09	0.002
		>60 years	-0.04	-0.04	-0.01	0.009	-0.03	-0.06	-0.01	0.012	-0.04	-0.06	-0.02	0.004
	PM2.5 (per increase 5 μg/m3)	0 - 4 years	-0.01	-0.09	9.02	0.984									9895
		5 -9 years	-0.03	-12.1	9.02	0.496
		10 - 14 years	-0.02	-11.2	7.03	0.663
		15-44 years	3.76	-0.01	7.88	0.063	2.2	-0.02	6.48	0.298	-0.09	-15.26	-0.003	0.006
		45 - 60 years	2.24	-0.03	7.76	0.408	0.95	-0.05	6.76	0.74	-0.01	-0.07	6.28	0.923
		>60 years	3.19	-0.02	7.64	0.144	4.29	-0.01	8.97	0.061	7.18	2.53	12.03	0.002
	CO max 8 hours (per increase in 0,4 mg/m3)	0 - 4 years	-0.01	-0.02	0.27	0.195									6912
		5 -9 years	0.56	-0.01	1.37	0.172
		10 - 14 years	0.35	-0.01	1.17	0.39
		15-44 years	0.08	-0.01	0.45	0.649	0.78	0.41	11.65	0	-0.02	-0.02	-0.01	0
		45 - 60 years	-0.01	-0.01	0.3	0.455	0.6	0.09	1.11	0.021	0.88	0.28	1.48	0.004
		>60 years	-0.01	-0.01	0.37	0.915	0.6	0.22	1.03	0.02	0.53	0.12	0.95	0.01
	O3 max 8 hours (per increase in 10 μg/m3)	0 - 4 years	9.83	6	13.79	0									13428
		5 -9 years	-0.02	-0.05	1.56	0.324
		10 - 14 years	-0.03	-0.06	0.74	0.134
		15-44 years	2.08	0.59	3.59	0.006	1.81	0.33	3.3	0.016	0.51	-0.02	2.82	0.659
		45 - 60 years	-0.01	-0.02	1.89	0.958	-0.02	-0.04	0.6	0.182	2.91	0.63	5.25	0.012
		>60 years	-0.03	-0.05	-0.02	0	-0.03	-0.04	-0.01	0.005	-0.02	-0.03	0.2	0.09
	Change refers to the percentage of change in the rate of emergency department visits for the specific disease groups, adjusted for temperature, relative humidity, precipitation, and their interactions with pollutant concentrations. All pollutants were centered to the value that represented 20% of the global mean concentration in the time-series for the four cities. Positive, statistically signifi…

## Sheet: Bucaramanga
	Table S4. Estimates of the effect on the general population in terms of respiratory, cardiovascular, and cerebrovascular diseases, by type of pollutant and age group, Bucaramanga, 2011-2014
	BUCARAMANGA
	Pollutant	Age group	Respiratory diseases				Cardiovascular diseses				Cerebrovascular diseases
			Changea	IC 95%		p	Changea	IC 95%		p	Changea	IC 95%		p	Obs
	NO2 (per increase in 6 μg/m3)	0 - 4 years	-24.56	-27.37	-19.97	0									18498
		5 -9 years	-0.02	-0.05	3.02	0.616
		10 - 14 years	3.1	-0.01	7.34	0.138
		15-44 years	2.78	0.71	4.89	0.008	2.64	0.47	4.87	0.017	1.51	-0.04	6.97	0.575
		45 - 60 years	1.29	-0.02	3.99	0.339	2.89	0.15	5.71	0.038	6.91	3.38	10.55	0
		>60 years	0.42	-0.02	2.66	0.707	4.96	2.7	7.26	0	-0.03	-0.04	-0.01	0.002
	SO2 (per increase in 2 μg/m3)	0 - 4 years	7.97	3.77	12.34	0									13955
		5 -9 years	1.15	-0.03	4.44	0.483
		10 - 14 years	-0.01	-0.04	2.53	0.657
		15-44 years	1.6	-0.01	3.26	0.054	0.17	-0.02	1.88	0.839	17.31	12.42	22.41	0
		45 - 60 years	-0.01	-0.03	1.51	0.574	1.31	-0.01	3.55	0.24	-0.04	-0.07	0.03	0.052
		>60 years	-0.02	-0.03	0.61	0.199	0.27	-0.02	2.03	0.752	3.56	1.71	5.46	0
	PM10 (per increase 10 μg/m3)	0 - 4 years	-19.35	-25.15	-12.88	0									18547
		5 -9 years	-0.02	-0.08	4.77	0.628
		10 - 14 years	-0.01	-0.07	6.24	0.95
		15-44 years	3.61	0.55	6.77	0.02	5.47	2.08	8.97	0.001	1.81	-0.07	10.91	0.681
		45 - 60 years	-0.02	-0.06	2.1	0.35	5.68	1.37	10.17	0.009	10.84	4.11	18.03	0.001
		>60 years	-0.01	-0.04	2.97	0.833	6.39	2.91	9.99	0	3.65	0.1	7.32	0.043
	PM2.5 (per increase 5 μg/m3)	0 - 4 years	-0.04	-11.9	2.71	0.242									8241
		5 -9 years	1.89	-0.05	8.34	0.548
		10 - 14 years	2.11	-0.05	8.66	0.51					No estimable
		15-44 years	0.4	-0.03	3.18	0.771	-0.02	-0.05	1.25	0.259
		45 - 60 years	-0.03	-0.07	1.2	0.179	2.25	-0.02	6.32	0.264
		>60 years	-0.01	-0.04	2.93	0.93	-0.01	-0.04	2.64	0.789
	CO max 8 hours (per increase in 0,4 mg/m3)	0 - 4 years	-0.02	-0.03	-0.02	0									18498
		5 -9 years	-0.01	-0.01	0.19	0.616
		10 - 14 years	0.2	-0.01	0.47	0.138
		15-44 years	0.18	0.04	0.32	0.008	0.17	0.03	0.31	0.017	0.09	-0.01	0.45	0.575
		45 - 60 years	0.08	-0.01	0.26	0.339	0.19	0.01	0.37	0.038	0.44	0.22	0.67	0
		>60 years	0.02	-0.01	0.17	0.707	0.32	0.17	0.46	0	-0.01	-0.01	-0.01	0.002
	O3 max 8 hours (per increase in 10 μg/m3)	0 - 4 years	-0.07	-12.4	-0.02	0.011									18547
		5 -9 years	-0.05	-0.98	0.02	0.051
		10 - 14 years	0.15	-0.05	5.14	0.951
		15-44 years	1.24	-0.02	3.74	0.32	-0.01	-0.04	1.73	0.51	-0.05	-11.4	2.67	0.232
		45 - 60 years	2.15	-0.02	5.42	0.186	0.43	-0.03	3.75	0.796	10.78	5.73	16.08	0
		>60 years	2.35	-0.01	5.08	0.084	-0.02	-0.04	1.45	0.376	3.88	1.09	6.74	0.006
	Change refers to the percentage of change in the rate of emergency department visits for the specific disease groups, adjusted for temperature, relative humidity, precipitation, and their interactions with pollutant concentrations. All pollutants were centered to the value that represented 20% of the global mean concentration in the time-series for the four cities. Positive, statistically signifi…
